# Supplementary material
Source: Research Square preprint supplement (doi:10.21203/rs.3.rs-9039106/v1)
Supplement: Supplementary file 1 [file d21a0cae7f0482d56a164a62.docx]

Tab. S1 Primer sequences

| Name | Sequence（5’-3’） | Functions |
| --- | --- | --- |
| *GbJMJ25-GFP-F* | acgggggactcttgaccatggATGGGAAGTGAGGAAAATTGCG | p*CAMBIA1304*::*GbJMJ25*::GFP **Construction** |
| *GbJMJ25-GFP-R* | aagttcttctcctttactagtTCCAGCTTTAGTCTTGAGCTTAATCT |
| *GbJMJ25-v F* | gtgagtaaggttaccgaattcATGGGAAGTGAGGAAAATTGCG | p*TRV2*::*GbJMJ2* **Construction** |
| *GbJMJ25-v R* | cgtgagctcggtaccggatccCCTCTTAGAAGAACCTGCCGCT |
| *GbJMJ25- anti F* | gggaggcctggatcgactagtAATGATAAAGGCAGGGTTGTGAG | p*TA7002*::*GbJMJ25* **Construction** |
| *GbJMJ25- anti R* | ctagtcgactctagcctcgagACCACTACCTCAGACCAATCTAAGC |
| *CLAI-qF* | AGCAACGCCTCTCTTGGACA | **qRT-PCR** |
| *CLAI-qR* | AAATCACATCAGACCGCAGT |
| *GbCAT-qF* | AAGCCCAACCCTAAGTCCC |
| *GbCAT-qR* | GCCAGCCTTGTTAATCAGAGT |
| *GbSOD1-qF* | ACACAACTAACGGGTGCAT |
| *GbSOD1-qR* | GCACAGCCATCATCACCAAC |
| *GbBI-1-qF* | CTTCCTCTGTTTTCGGTGGTT |
| *GbBI-1-qR* | CAGGTCACCCAAATGTGCTT |
| *GbJMJ25-qF* | CTTACACAGGCAGTTTGTCGT |
| *GbJMJ25-qR* | CACCCTGCAAATGTCCATCG |
| *GbUBQ7-qF* | GACCTACACCAAGCCCAAGAAG |
| *GbUBQ7-qR* | TGAGCCCACACTTACCACCATAGT |

lowercase letters indicate the vector sequence.
